# Supplementary material for: On the reaction mechanism of an endoperoxide ring formation by fumitremorgin B endoperoxidase. The right arrangement makes a difference
Source: Royal Society of Chemistry journal article supplement (doi:10.1039/c9dt02581b), 2019-01-01
Supplement: c9dt02581b1.pdf [file c9dt02581b1.pdf]

## On the reaction mechanism of an endoperoxide ring formation by fumitremorgin B endoperoxidase. The right arrangement makes a difference

### Supplementary Information

#### List of figures:

**Fig. S1.** FtmF cavity with the substrate in geometry **A**) taken from PDB (4ZON) **B**) obtained by docking.

**Fig. S2.** Active site region of the 4ZON structure with an electron density map displayed.

**Fig. S3.** RMSD plots for MD production runs.

**Fig. S4.** Plot of the distance between the abstracted hydrogen atom and the phenolic oxygen atom of Y224 in MD runs.

**Fig S5.** QM active site model used in DFT calculations.

**Fig S6.** QM model used to study the reaction with ascorbate.

**Fig S7.** A scheme of reaction pathways considered in this study.

**A)**

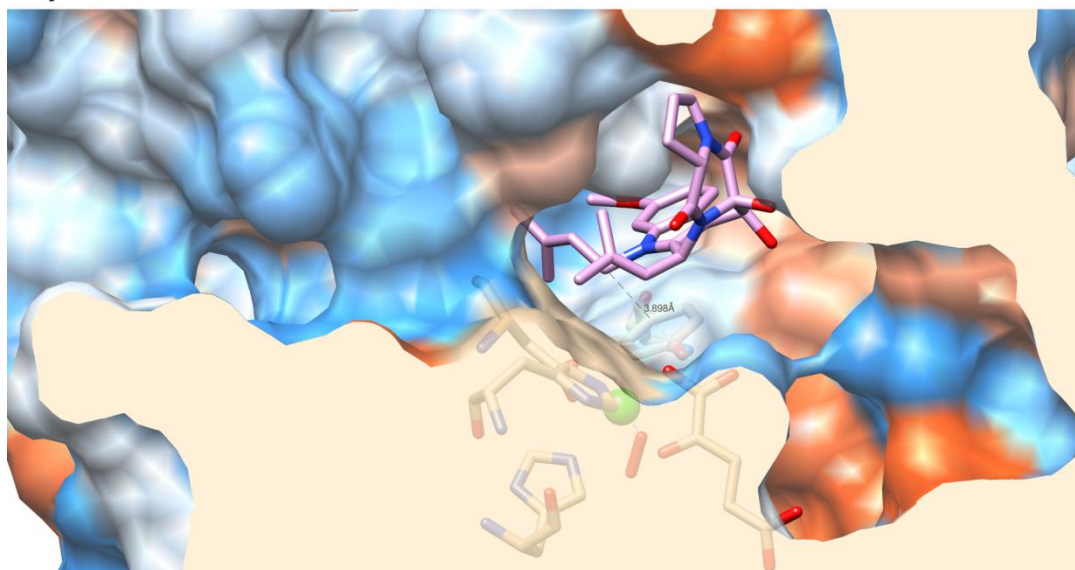

hydrophilic

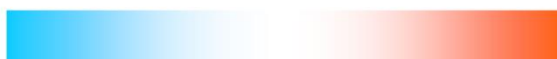

hydrophobic

**B)**

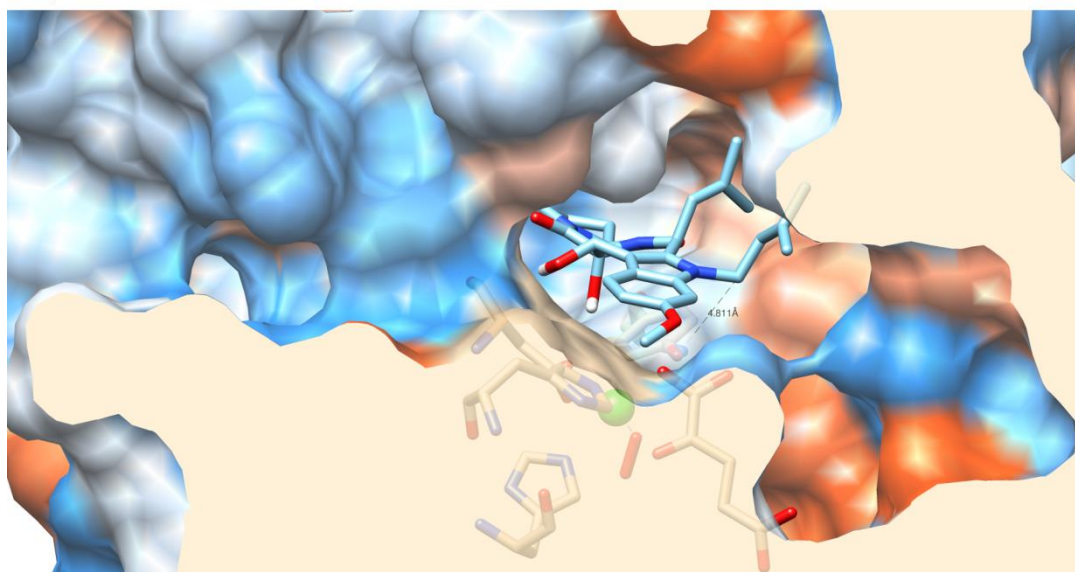

**Fig. S1.** FtmF cavity with the substrate in geometry **A)** taken from PDB (4ZON) **B)** obtained by docking (AutoDock 4.2.6)

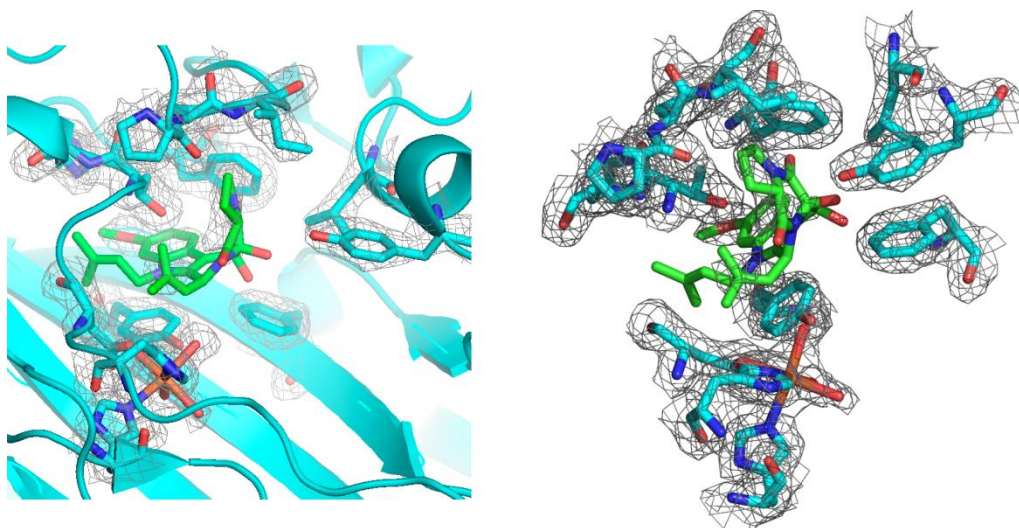

**Fig. S2.** Active site region of the 4ZON structure with an electron density map displayed.

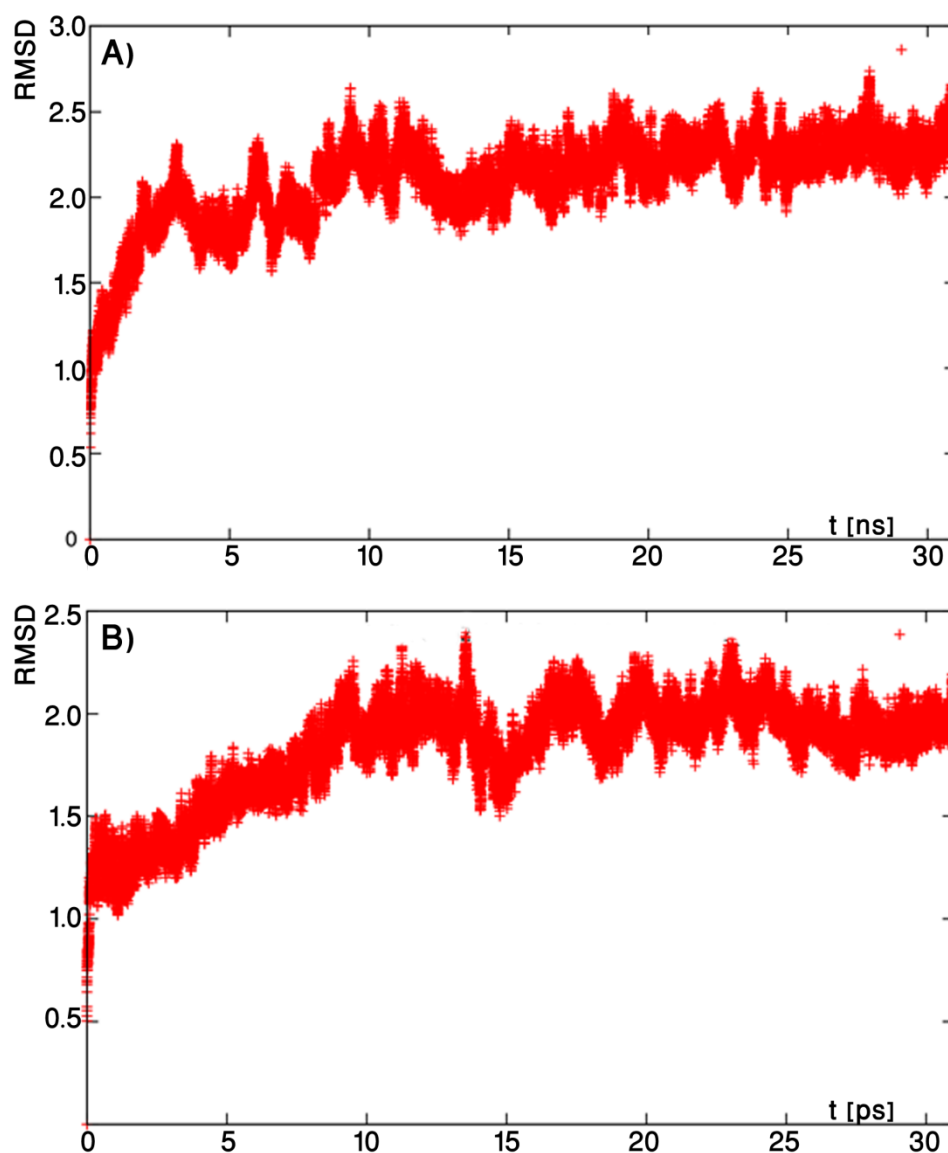

**Fig. S3.** RMSD plot for 31 ns of MD production run for FtmF with fumitremorgin B bound in orientation as: **A)** in the 4ZON structure, **B)** obtained by docking

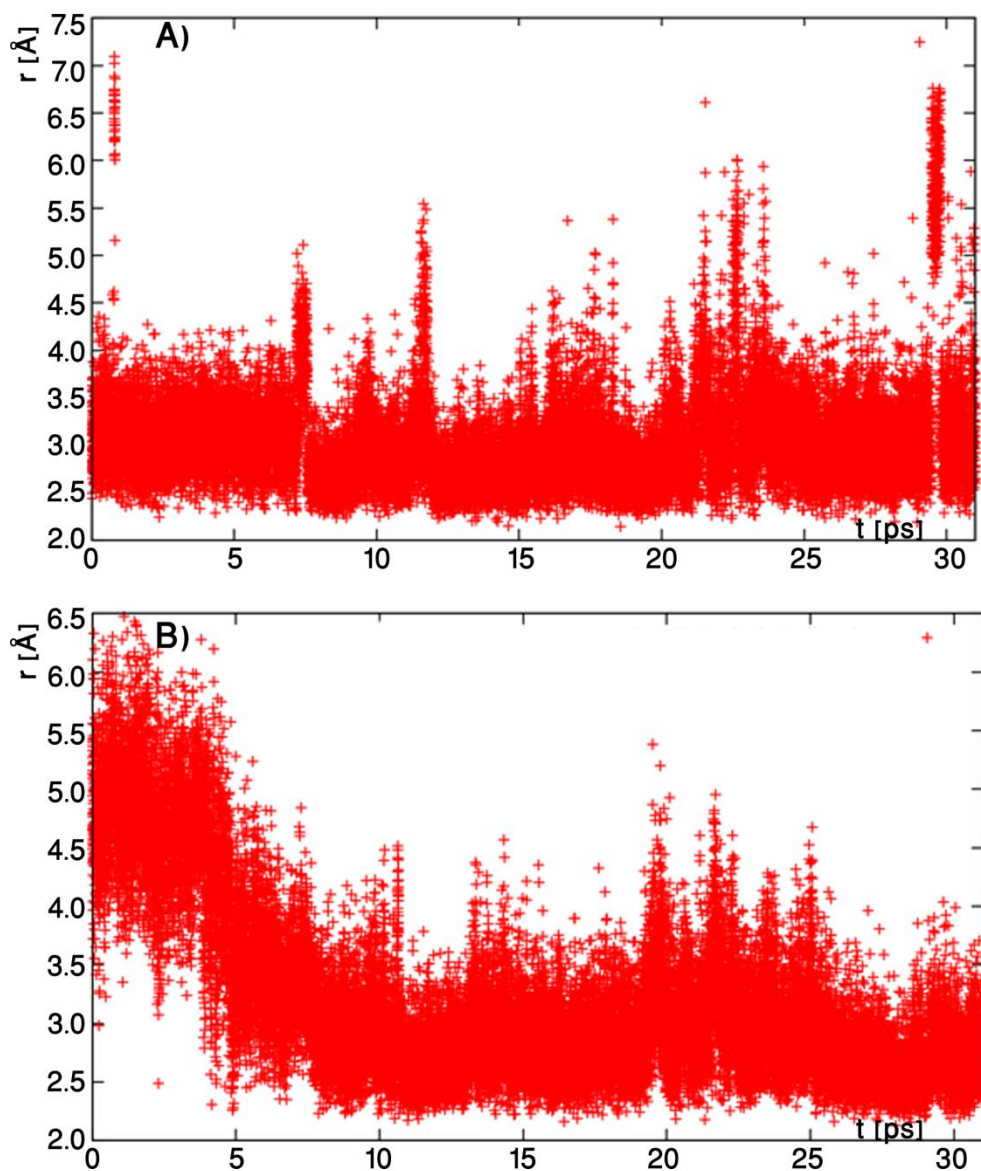

**Fig. S4.** Distance between the  $H_R$  atom of fumitremorgin B and the phenolic oxygen atom of Y224 in MD runs for FtmF with fumitremorgin B bound in orientation as: **A)** in the 4ZON structure, **B)** obtained by docking

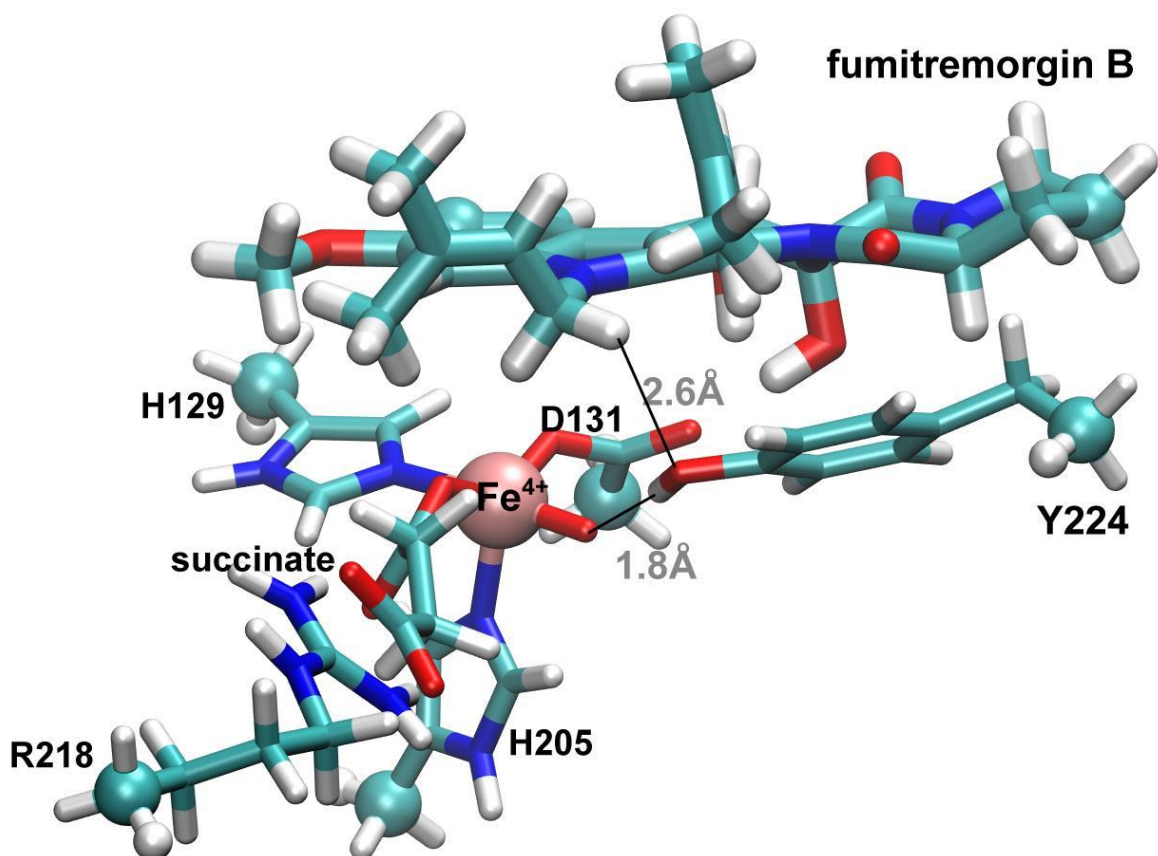

**Fig S5.** A cluster model used in DFT calculation to study catalytic reaction mechanism of FtmF. Carbons and hydrogens frozen during geometry optimisation are shown as balls. Crucial distances are depicted in gray.

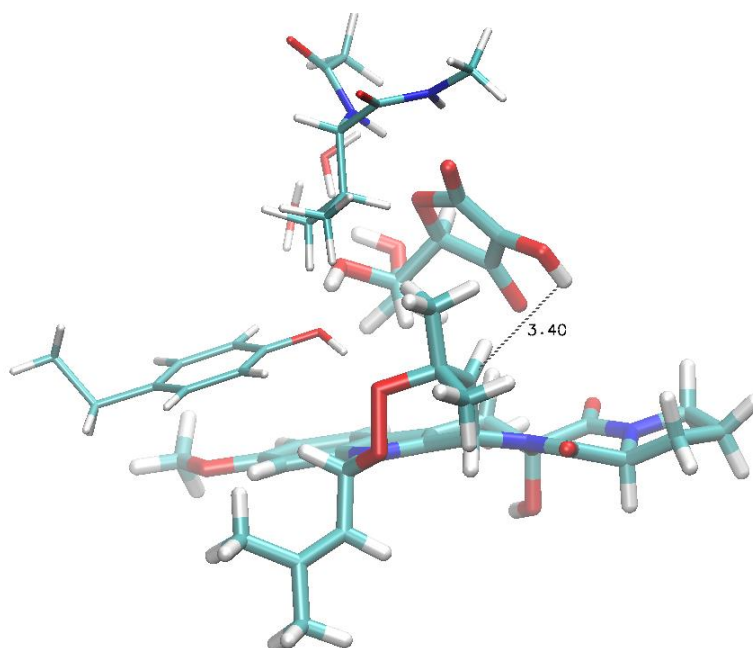

**Fig S6.** QM model used to study the reaction with ascorbate.

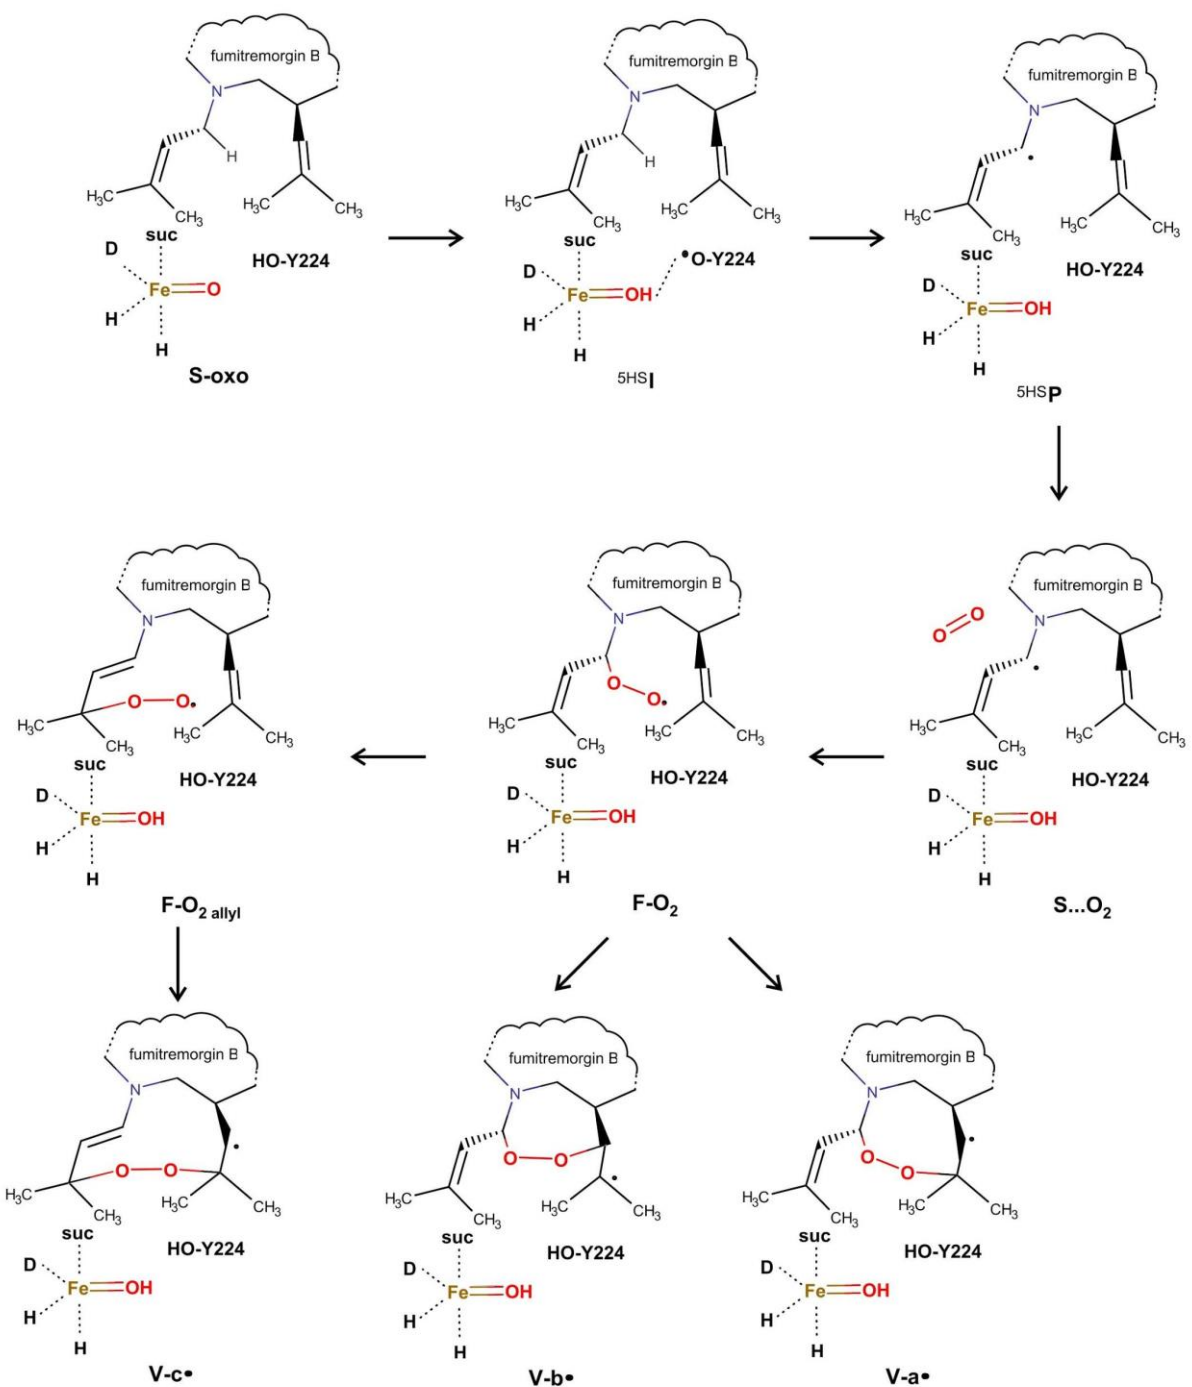

Fig S7. A scheme of reaction pathways considered in this study.
